# Supplementary material
Source: PubMed Central journal article supplement (PMC2980299)
Supplement: 00544.2009_1.pdf [file 00544.2009_1.pdf]

Supplemental Table 1. Sequences of RT-PCR

| mRNA              | Sequence           |                                                                              |
|-------------------|--------------------|------------------------------------------------------------------------------|
| Osteopontin       | Forward<br>Reverse | 5'-GACCATGAGATTGACAGTGATTTG-3'<br>5'-TGATGTTCCAGGCTGGCTTTG-3'                |
| Type I collagen   | Forward<br>Reverse | 5'-AATGGTGAGACGTGGAAACCCGAG-3'<br>5'-CGACTCCTACATCTTCTGAGTTTGG-3'            |
| Periostin (OSF-2) | Forward<br>Reverse | 5'-TGGAAGGGATGAAAGGCTGC-3'<br>5'-TGGACGACACCATTTGTGGC-3'                     |
| PTH/PTHrP-R       | Forward<br>Reverse | 5'-CAAGAAGTGGATCATCCAGGT-3'<br>5'-GCTGCTACTCCCCTTCGTGCTTT-3'                 |
| Osteocalcin       | Forward<br>Reverse | 5'-GACAAAGCCTTCATGTCCAAGC-3'<br>5'-AAAGCCGAGCTGCCAGAGTTTG-3'                 |
| Osterix (Osx)     | Forward<br>Reverse | 5'-GCAACTGGCTAGGTGGTGGTC -3'<br>5'-GCAAAGTCAGATGGGTAAGTAGGC-3'               |
| Runx2             | Forward<br>Reverse | 5'-AAATGCCTCCGCTGTTATGAA-3'<br>5'- GCTCCGGCCACAAATCT-3'                      |
| β-actin           | Forward<br>Reverse | 5'-AGCAGCCGTGGCCATCTCTTGCTCGAAGTC-3'<br>5'-AACCGCGAGAAGATGACCCAGATCATGTTT-3' |
