# Supplementary material
Source: PubMed Central journal article supplement (PMC2980299)
Supplement: 00544.2009_2.pdf [file 00544.2009_2.pdf]

Supplemental Table 2. Sequences of qPCR

| mRNA            | Sequence  |                          |
|-----------------|-----------|--------------------------|
| Osteopontin     | sense     | GCTTGGCTTATGGACTGAGG     |
|                 | antisense | CGCTCTTCATGTGAGAGGTG     |
| Type I collagen | sense     | GCAACAGTCGCTTACCTACA     |
|                 | antisense | CAATGTCCAAGGGAGCCACAT    |
| Osteocalcin     | sense     | GCAATAAGGTAGTGAACAGACTCC |
|                 | antisense | GTTTGTAGGCGGTCTTCAAGC    |
| Osterix (Osx)   | sense     | GCAACTGGCTAGGTGGTGGTC    |
|                 | antisense | GCAAAGTCAGATGGGTAAGTAGGC |
| Runx2           | sense     | AAATGCCTCCGCTGTTATGAA    |
|                 | antisense | GCTCCGGCCCACAAATCT       |
| β-actin         | sense     | CGTTGACATCCGTAAAGACC     |
|                 | antisense | TCTCCTTCTGCATCCTGTCA     |
